# Supplementary material for: Mushroom Polysaccharides as Potential Candidates for Alleviating Neurodegenerative Diseases
Source: MDPI journal article supplement (doi:10.3390/nu14224833), 2022-11-15
Supplement: s1 [file s1]

1 **Table S1.** Effects and side effects of medications for the treatment of NDs.

| NDs | Types                                        | Drug                                                        | Effects                                                                                                                                                                          | Adverse effect                                                                                                                                                | Reference |
|-----|----------------------------------------------|-------------------------------------------------------------|----------------------------------------------------------------------------------------------------------------------------------------------------------------------------------|---------------------------------------------------------------------------------------------------------------------------------------------------------------|-----------|
| AD  | Cholinesterase inhibitors                    | Galantamine, memantine, rivastigmine, donepezil and tacrine | Inhibiting the activity of AChE, thereby increasing the cholinergic levels in the brain                                                                                          | Convulsions, vomiting, nausea, diarrhea, stomach cramps, liver damage, weight loss, chest pain, muscle cramps and weakness, irregular breathing and heartbeat | [1]       |
|     | Anti-oxidant drugs                           | Melatonin, monoamine oxidase inhibitors                     | Anti-oxidation, anti-inflammatory effects, inhibitory effects on the A $\beta$ generation                                                                                        | Hypertensive crisis, hypertension                                                                                                                             | [2,3]     |
|     | Calcium channel blockers                     | Flunarizine, nimodipine, nilvadipine, nitrendipine          | Decreasing calcium influx through the plasma membrane and impairment of synapse physiology, protecting AD cells from A $\beta$ oligomer production                               | Affecting normal neurotransmission                                                                                                                            | [4]       |
|     | Drugs directed at $\beta$ 1 amyloid          | MK-8931, E2069                                              | Decreasing the concentrations of cerebral A $\beta$                                                                                                                              | Seizures, hypomyelination, axon guidance defects, neurogenesis abnormalities, memory deficits                                                                 | [5]       |
| PD  | Catechol-O-methyltransferase inhibitors      | Entacapone, tolcapone, opicapone                            | Inhibiting catechol-O-methyl transferase enzyme, leading to a higher levodopa concentration in the blood                                                                         | Liver toxicity, drowsiness, nausea, insomnia, hallucination, dizziness                                                                                        | [6]       |
|     | Drugs for stimulating dopaminergic signaling | Levodopa, DOPA decarboxylase inhibitors                     | Being converted to dopamine and stored in the vesicles of presynaptic dopaminergic neurons                                                                                       | Abnormal involuntary movements and results in levodopa-induced dyskinesia                                                                                     | [7]       |
|     | Inhibitors of the monoamine oxidase B        | Rasagiline, selegiline                                      | Degrading the neurotransmitter dopamine that is deficient in the nigro-striatal region in PD, and forms H <sub>2</sub> O <sub>2</sub> and toxic aldehyde metabolites of dopamine | Vomiting, nausea, hypotension                                                                                                                                 | [8]       |

|     |                                                          |                                          |                                                                                                                                                      |                                                                                                           |        |
|-----|----------------------------------------------------------|------------------------------------------|------------------------------------------------------------------------------------------------------------------------------------------------------|-----------------------------------------------------------------------------------------------------------|--------|
|     | Dopamine agonists                                        | Apomorphine, ergot alkaloids, ropinirole | Induce an antiparkinsonian effect through actions on either D1-like or D2-like dopamine receptors                                                    | Producing dyskinesia identical to that of levodopa                                                        | [9,10] |
| HD  | Inhibitors of the vesicular monoamine transporter type 2 | Deutetrabenazine, tetrabenazine          | Inhibiting vesicular monoamine transporter type 2, decreasing available dopamine in the synapse and interacting with postsynaptic dopamine receptors | Parkinsonism, depression, akathisia, anxiety, fatigue                                                     | [11]   |
| ALS | Anti-excitotoxic drug                                    | Riluzole                                 | Blocks the presynaptic release of glutamate                                                                                                          | Nausea, asthenia, vomiting, diarrhoea, anorexia, dizziness, increased alanine transferase, low hemoglobin | [12]   |
|     | Anti-oxidant drug                                        | Edaravone                                | A free radical scavenger to reduce oxidative stress                                                                                                  | Abnormal liver function, increased alanine transferase                                                    | [13]   |

## References

- Sharma, K. Cholinesterase inhibitors as Alzheimer's therapeutics. *Molecular Medicine Reports* **2019**, *20*, 1479–1487, doi:10.3892/mmr.2019.10374.
- Ostadkarampour, M.; Putnins, E.E. Monoamine Oxidase Inhibitors: A Review of Their Anti-Inflammatory Therapeutic Potential and Mechanisms of Action. *Frontiers in Pharmacology* **2021**, *12*, doi:10.3389/fphar.2021.676239.
- Cardinali, D.P.; Vigo, D.E.; Olivar, N.; Vidal, M.F.; Brusco, L.I. Melatonin Therapy in Patients with Alzheimer's Disease. *Antioxidants (Basel)* **2014**, *3*, 245–277, doi:10.3390/antiox3020245.
- Nimmrich, V.; Eckert, A. Calcium channel blockers and dementia. *British Journal of Pharmacology* **2013**, *169*, 1203–1210, doi:10.1111/bph.12240.
- Blume, T.; Filser, S.; Jaworska, A.; Blain, J.F.; Koenig, G.; Moschke, K.; Lichtenthaler, S.F.; Herms, J. BACE1 Inhibitor MK-8931 Alters Formation but Not Stability of Dendritic Spines. *Front Aging Neurosci* **2018**, *10*, 229, doi:10.3389/fnagi.2018.00229.
- Salamon, A.; Zádori, D.; Szpisjak, L.; Klivényi, P.; Vécsei, L. What is the impact of catechol-O-methyltransferase (COMT) on Parkinson's disease treatment? *Expert opinion on pharmacotherapy* **2022**, *23*, 1123–1128, doi:10.1080/14656566.2022.2060738.
- Bandopadhyay, R.; Mishra, N.; Rana, R.; Kaur, G.; Ghoneim, M.M.; Alshehri, S.; Mustafa, G.; Ahmad, J.; Alhakamy, N.A.; Mishra, A. Molecular Mechanisms and Therapeutic Strategies for Levodopa-Induced Dyskinesia in Parkinson's Disease: A Perspective Through Preclinical and Clinical Evidence. *Front Pharmacol* **2022**, *13*, 805388, doi:10.3389/fphar.2022.805388.
- Nagatsu, T.; Sawada, M. Molecular mechanism of the relation of monoamine oxidase B and its inhibitors to Parkinson's disease: possible implications of glial cells. *Journal of neural transmission. Supplementum* **2006**, 10.1007/978-3-211-33328-0\_7, 53–65, doi:10.1007/978-3-211-33328-0\_7.
- Jenner, P. Pharmacology of dopamine agonists in the treatment of Parkinson's disease. *Neurology* **2002**, *58*, S1–8, doi:10.1212/wnl.58.suppl\_1.s1.
- Sit, S.Y. Dopamine agonists in the treatment of Parkinson s disease past, present and future. *Current pharmaceutical design* **2000**, *6*, 1211–1248, doi:10.2174/1381612003399581.
- Potkin, K.T.; Potkin, S.G. New directions in therapeutics for Huntington disease. *Future neurology* **2018**, *13*, 101–121, doi:10.2217/fnl-2017-0035.
- Miller, R.G.; Mitchell, J.D.; Lyon, M.; Moore, D.H. Riluzole for amyotrophic lateral sclerosis (ALS)/motor neuron disease (MND). *Amyotrophic Lateral Sclerosis* **2003**, *4*, 191–206.
- Chio, A.; Mazzini, L.; Mora, G. Disease-modifying therapies in amyotrophic lateral sclerosis. *Neuropharmacology* **2020**, *167*, 107986, doi:10.1016/j.neuropharm.2020.107986.
